# Supplementary material
Source: publisher site journal article supplement (https://www.dovepress.com/article/370755)
Supplement: Supplementary file 1 [file get_supplementary_file.php]

| Treatment in the outpatient department | Weak Producer (n=27) | Strong Producer (n=26) | P value |
| --- | --- | --- | --- |
| % Antibiotic intake | 40.7 (11/27) | 76.9 (20/26) | 0.008 |
| % Macrolide intake | 14.8 (4/27) | 61.5 (16/26) | 0.001 |
| % Glucocorticoids intake | 40.7 (11/27) | 19.2 (5/26) | 0.079 |

Supplement Table 1. History of treatment in the outpatient department among CA-MRSA groups with the different biofilm-forming capacity
